# Supplementary material
Source: PubMed Central journal article supplement (PMC2748236)
Supplement: NIHMS128838-supplement-1.pdf [file NIHMS128838-supplement-1.pdf]

## SUPPLEMENTAL MATERIAL

### Technical Appendix

Probabilities of development of a CVD event in the 30-year risk horizon adjusted for the competing risk of non-CVD death based on significant risk factors were calculated following the developments presented in<sup>33</sup> and adapted to our situation. We outline them below.

For CVD event define  $\lambda_{CVD}(t)$  to be the instantaneous hazard function and  $\Lambda_{CVD}(t)$  the cumulative hazard function. Similarly, define the equivalent quantities,  $\lambda_{DTH}(t)$  and  $\Lambda_{DTH}(t)$ , for the death outcome. Now define the probability of not failing from either cause as  $S(t) = \exp[-(\Lambda_{CVD}(t) + \Lambda_{DTH}(t))]$  and the cumulative incidence function for CVD event (the probability of

experiencing CVD event before time  $t$ ) as  $I_{CVD}(t) = \int_0^t \lambda_{CVD}(u)S(u)du$ . This quantity is estimated

at 30 years of follow-up as:

$$\hat{I}_{CVD}(30) = \sum_{t_i < 30} \hat{\lambda}_{CVD}(t_i) \hat{S}(t_{i-1}) \quad (A1)$$

where  $t_i, i = 1, \dots, n_{EV}$  are the ordered event times and  $t_0 = 0$ . The quantities under the summation are estimated as:

$$\hat{S}(t_{i-1}) = \exp[-(\hat{\Lambda}_{CVD}(t_{i-1}) + \hat{\Lambda}_{DTH}(t_{i-1}))] = \hat{S}_{CVD}(t_{i-1}) \cdot \hat{S}_{DTH}(t_{i-1}) \quad (A2)$$

where the last two survival functions are taken directly from the standard Cox models for CVD events and non-CVD deaths, treating the other outcome as censoring event;

$$\hat{\lambda}_{CVD}(t_i) = \hat{\Lambda}_{CVD}(t_i) - \hat{\Lambda}_{CVD}(t_{i-1}) = -\log(\hat{S}_{CVD}(t_i)) + \log(\hat{S}_{CVD}(t_{i-1})). \quad (A3)$$

In our application we used the risk factors significant in the CVD models in the models for non-CVD death. The recursive nature of formula (A1) makes it impossible to give a closed form solution for the estimated risk.

## Appendix Table

### Hazard ratios\* with 95% confidence intervals for 30-year risk of full CVD

| Variables                         | Main Model        | Simple Model      |
|-----------------------------------|-------------------|-------------------|
| <b>Male Sex</b>                   | 1.41 (1.23, 1.62) | 1.72 (1.51, 1.96) |
| <b>Age</b>                        | 1.98 (1.83, 2.14) | 2.05 (1.90, 2.21) |
| <b>Systolic Blood Pressure</b>    | 1.27 (1.19, 1.35) | 1.24 (1.16, 1.32) |
| <b>Antihypertensive Treatment</b> | 1.69 (1.31, 2.17) | 1.70 (1.32, 2.19) |
| <b>Smoking</b>                    | 1.81 (1.60, 1.05) | 1.99 (1.76, 2.25) |
| <b>Diabetes</b>                   | 1.98 (1.49, 2.65) | 2.22 (1.66, 2.95) |
| <b>Total cholesterol</b>          | 1.24 (1.16, 1.33) | -                 |
| <b>HDL cholesterol</b>            | 0.77 (0.72, 0.82) | -                 |
| <b>Body Mass Index</b>            | -                 | 1.18 (1.10, 1.26) |

\*Hazard ratios for continuous risk factors are given per 1 standard deviation increase in the natural logarithm.

All p-values were less or equal to 0.01.

Title for the interactive risk calculator:

### **30-year risk of cardiovascular disease**

Legend:

Hard CVD includes coronary death, myocardial infarction and fatal and non-fatal stroke.

Full CVD includes hard CVD plus coronary insufficiency, angina pectoris, transient ischemic attack, intermittent claudication and congestive heart failure.
